# Supplementary material
Source: Springer Nature journal article supplement (https://www.springermedizin.de/resource/supplementary/12936_2009_1058_MOESM1_ESM.pdf/9548880)

Malaria cases in infants <6 months

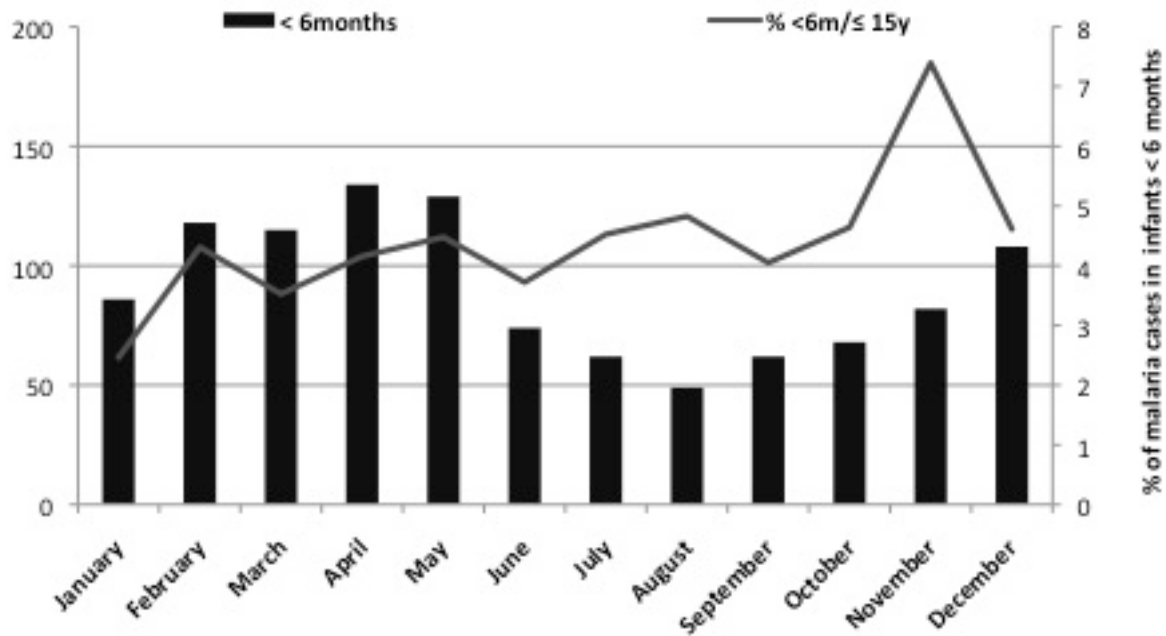

Supplement: MOESM1 [file 9548880]
